# Supplementary material
Source: MDPI journal article supplement (https://www.mdpi.com/2072-4292/13/15/2918)
Supplement: s1 [file s1]

**Supplementary Table S1.** Wheat genotypes used in the field trial.

| <b>Sr. No.</b> | <b>Wheat Genotypes</b> | <b>Growth Type</b> |
|----------------|------------------------|--------------------|
| 1              | Barham                 | Spring             |
| 2              | Bolac                  | Spring             |
| 3              | Carnamah               | Spring             |
| 4              | Crusader               | Spring             |
| 5              | Derrimut               | Spring             |
| 6              | EGA Gregory            | Spring             |
| 7              | EGA Hume               | Spring             |
| 8              | EGA Wylie              | Spring             |
| 9              | Ellison                | Spring             |
| 10             | Espada                 | Spring             |
| 11             | Excalibur              | Spring             |
| 12             | Gladius                | Spring             |
| 13             | Hartog                 | Spring             |
| 14             | Kennedy                | Spring             |
| 15             | Peake                  | Spring             |
| 16             | Sunco                  | Spring             |
| 17             | Sunvale                | Spring             |
| 18             | Sunzell                | Spring             |
| 19             | Ventura                | Spring             |
| 20             | Volcani DDI            | Spring             |

**Supplementary Table S2.** List of vegetation indices relating to physiology and canopy structure used in this study.

| Vegetation indices                                | Equation                                                                      | Reference |
|---------------------------------------------------|-------------------------------------------------------------------------------|-----------|
| Normalized difference vegetation index            | $NDVI = \frac{NIR - RED}{NIR + RED}$                                          | [1]       |
| Blue normalized difference vegetation index       | $BNDVI = \frac{NIR - BLUE}{NIR + BLUE}$                                       | [2]       |
| Green normalized difference vegetation index      | $GNDVI = \frac{NIR - GREEN}{NIR + GREEN}$                                     | [3]       |
| Normalized difference red-edge index              | $NDRE = \frac{NIR - RE}{NIR + RE}$                                            | [4]       |
| Red-blue normalized difference vegetation index   | $RB - NDVI = \frac{NIR - (RED + BLUE)}{NIR + (RED + BLUE)}$                   | [2]       |
| Green-blue normalized difference vegetation index | $GB - NDVI = \frac{NIR - (GREEN + BLUE)}{NIR + (GREEN + BLUE)}$               | [2]       |
| Green-red normalized difference vegetation index  | $GR - NDVI = \frac{NIR - (GREEN + RED)}{NIR + (GREEN + RED)}$                 | [2]       |
| Pan normalized difference vegetation index        | $PNDVI = \frac{NIR - (GREEN + RED + BLUE)}{NIR + (GREEN + RED + BLUE)}$       | [2]       |
| NIR-green difference vegetation index             | $GDVI = NIR - GREEN$                                                          | [2]       |
| Enhanced vegetation index                         | $EVI = \frac{2.5(NIR - RED)}{(NIR + 6 \times RED - 7.5 \times BLUE) + 1}$     | [5]       |
| Enhanced vegetation index2                        | $EVI2 = \frac{2.4(NIR - RED)}{(NIR + RED) + 1}$                               | [6]       |
| Enhanced vegetation index2-2                      | $EVI22 = \frac{2.4(NIR - RED)}{(NIR + 2.4 \times RED) + 1}$                   | [2]       |
| Normalized difference rededge/red                 | $NDRE - R = \frac{RE - RED}{RE + RED}$                                        | [2]       |
| Normalized green-red difference index             | $NGRDI = \frac{GREEN - RED}{GREEN + RED}$                                     | [7]       |
| Normalized red-blue difference index              | $NRBDI = \frac{GREEN - BLUE}{GREEN + BLUE}$                                   | [2]       |
| Red green blue vegetation indices                 | $RGBVI = \frac{(GREEN^2) - (BLUE \times RED)}{(GREEN^2) + (BLUE \times RED)}$ | [8]       |
| Green normalized difference water index           | $GNDWI = \frac{GREEN - NIR}{GREEN + NIR}$                                     | [9]       |
| Green leaf index                                  | $GLI = \frac{2 \times GREEN - RED - BLUE}{2 \times GREEN + RED + BLUE}$       | [10]      |
| Normalized green intensity                        | $NGI = \frac{GREEN}{RED + GREEN + BLUE}$                                      | [11]      |
| Renormalized difference vegetation index          | $RDVI = \frac{NIR - RED}{\sqrt{NIR + RED}}$                                   | [12]      |

|                                                |                                                                                                                         |      |
|------------------------------------------------|-------------------------------------------------------------------------------------------------------------------------|------|
| Soil adjusted vegetation index                 | $SAVI = 1.5 \left[ \frac{NIR - RED}{NIR + RED + 0.5} \right]$                                                           | [13] |
| Optimized soil adjusted vegetation index       | $OSAVI = 1.6 \left[ \frac{NIR - RED}{NIR + RED + 0.16} \right]$                                                         | [14] |
| Green optimized soil adjusted vegetation index | $GOSAVI = \left[ \frac{GREEN - RED}{GREEN + RED + 0.16} \right]$                                                        | [15] |
| Green soil adjusted vegetation index           | $GSAVI = 1.5 \left[ \frac{NIR - GREEN}{NIR + GREEN + 0.5} \right]$                                                      | [15] |
| Modified triangular vegetation index 1         | $MTVI1 = 1.2[1.2(NIR - GREEN) - 2.5(RED - GREEN)]$                                                                      | [16] |
| Modified triangular vegetation index 2         | $MTVI2 = \frac{1.8(NIR - GREEN) - 3.75(RED - GREEN)}{\sqrt{(2 \times NIR + 1)^2 - (6 \times NIR - 5\sqrt{RED})}} - 0.5$ | [16] |
| Transformed vegetation index                   | $TVI = \sqrt{(NIR - RED)/(NIR + RED)} - 0.5$                                                                            | [17] |
| Transformed difference vegetation index        | $TDVI = \sqrt{0.5 \times (NIR - RED)/(NIR + RED)}$                                                                      | [18] |

**Supplementary Table S3.** List of vegetation morphological features used in this study.

| <b>Morphological features</b> | <b>Description</b>                                                                                                   |
|-------------------------------|----------------------------------------------------------------------------------------------------------------------|
| Area                          | The planimetric space occupied by the image objects                                                                  |
| Convex-hull area              | The planimetric space enclosed by minimum convex polygons of the image objects                                       |
| Perimeter                     | The path that surrounds the image objects                                                                            |
| Eccentricity                  | The ellipse that has the same second-moments as the image objects                                                    |
| Elongation                    | The ratio of normal area to the square of thickness of the image objects                                             |
| Equivalent diameter           | The diameter of a circle with the same area as the image objects                                                     |
| Feret diameter                | The longest distance between points convex hull contours around the image objects                                    |
| Euler number                  | Euler characteristic of the set of non-zero pixels in the image objects                                              |
| Extent                        | The ratio of normal area to the area of total bounding box of the image objects                                      |
| Major axis length             | The length of the major axis of the ellipse that has the same normalized second central moments of the image objects |
| Minor axis length             | The length of the minor axis of the ellipse that has the same normalized second central moments of the image objects |
| Solidity                      | The ratio of normal area to convex-hull area of the image objects                                                    |

## References

- 1 Rouse, J., Haas, R., Schell, J., Deering, D. & Harlan, J. Monitoring the vernal advancement of retrogradation of natural vegetation (p. 371). *Greenbelt, MD: NASA/GSFC (Type III, Final Report)* (1974).
- 2 Henrich, V., Krauss, G., Götze, C. & Sandow, C. (2017).
- 3 Gitelson, A.A. & Merzlyak, M.N. Remote sensing of chlorophyll concentration in higher plant leaves. *Synergistic Use of Multisensor Data for Land Processes* **22**, 689-692, doi:Doi 10.1016/S0273-1177(97)01133-2 (1998).
- 4 Barnes, E. *et al.* in *Proceedings of the Fifth International Conference on Precision Agriculture, Bloomington, MN, USA*.
- 5 Huete, A. *et al.* Overview of the radiometric and biophysical performance of the MODIS vegetation indices. *Remote Sensing of Environment* **83**, 195-213, doi:Pii S0034-4257(02)00096-2. Doi 10.1016/S0034-4257(02)00096-2 (2002).
- 6 Jiang, Z., Huete, A.R., Didan, K. & Miura, T. Development of a two-band enhanced vegetation index without a blue band. *Remote Sensing of Environment* **112**, 3833-3845, doi:https://doi.org/10.1016/j.rse.2008.06.006 (2008).
- 7 Hunt, E.R., Cavigelli, M., Daughtry, C.S.T., McMurtrey, J.E. & Walthall, C.L. Evaluation of Digital Photography from Model Aircraft for Remote Sensing of Crop Biomass and Nitrogen Status. *Precision Agriculture* **6**, 359-378, doi:10.1007/s11119-005-2324-5 (2005).
- 8 Bendig, J. *et al.* Combining UAV-based plant height from crop surface models, visible, and near infrared vegetation indices for biomass monitoring in barley. *International Journal of Applied Earth Observation and Geoinformation* **39**, 79-87, doi:10.1016/j.jag.2015.02.012 (2015).
- 9 Palaseanu-Lovejoy, M., Kranenburg, C. & Brock, J.C. Land Area Change Analysis Following Hurricane Impacts in Delacroix, Louisiana, 2004–2009. *Change* **2008** (2006).
- 10 Louhaichi, M., Borman, M.M. & Johnson, D.E. Spatially Located Platform and Aerial Photography for Documentation of Grazing Impacts on Wheat. *Geocarto International* **16**, 65-70, doi:10.1080/10106040108542184 (2001).
- 11 Jia, L., Chen, X., Zhang, F., Buerkert, A. & Roemheld, V. Optimum Nitrogen Fertilization of Winter Wheat Based on Color Digital Camera Images. *Communications in Soil Science and Plant. Analysis* **38**, 1385-1394, doi:10.1080/00103620701375991 (2007).
- 12 Roujean, J.L. & Breon, F.M. Estimating Par Absorbed by Vegetation from Bidirectional Reflectance Measurements. *Remote Sensing of Environment* **51**, 375-384, doi:Doi 10.1016/0034-4257(94)00114-3 (1995).
- 13 Huete, A.R. A soil-adjusted vegetation index (SAVI). *Remote Sensing of Environment* **25**, 295-309, doi:https://doi.org/10.1016/0034-4257(88)90106-X (1988).
- 14 Rondeaux, G., Steven, M. & Baret, F. Optimization of soil-adjusted vegetation indices. *Remote Sensing of Environment* **55**, 95-107, doi:Doi 10.1016/0034-4257(95)00186-7 (1996).
- 15 Sripada, R.P., Heiniger, R.W., White, J.G. & Weisz, R. Aerial Color Infrared Photography for Determining Late-Season Nitrogen Requirements in Corn. *Agronomy Journal* **97**, 1443-1451, doi:https://doi.org/10.2134/agronj2004.0314 (2005).
- 16 Haboudane, D., Miller, J.R., Pattey, E., Zarco-Tejada, P.J. & Strachan, I.B. Hyperspectral vegetation indices and novel algorithms for predicting green LAI of crop canopies: Modeling and validation in the context of precision agriculture. *Remote Sensing of Environment* **90**, 337-352, doi:10.1016/j.rse.2003.12.013 (2004).
- 17 Tucker, C.J. Red and photographic infrared linear combinations for monitoring vegetation. *Remote Sensing of Environment* **8**, 127-150, doi:https://doi.org/10.1016/0034-4257(79)90013-0 (1979).
- 18 Bannari, A., Asalhi, H. & Teillet, P.M. in *IEEE International Geoscience and Remote Sensing Symposium*. 3053-3055 vol.3055.
